1 RESEARCH ARTICLE

2

3 **Enhanced production of natural shiga toxin by overexpressing A subunit of**  
4 **Stx2e in Stx2e-producing *Escherichia coli* isolated in South Korea**

5

6 Short Title : Enhanced production of shiga toxin by overexpressing A subunit of Stx2e in  
7 Stx2e-producing *Escherichia coli* isolate

8

9 Byoung Joo Seo<sup>1,a</sup>, Jeong Hee Yu<sup>1,a</sup>, Seung Chai Kim<sup>1</sup>, Yeong Ju Yu<sup>1</sup>, Byung Yong Park<sup>1</sup>,  
10 Jung Hee Park<sup>2,3,\*</sup>, Won Il Kim<sup>1,\*</sup>, and Jin Hur<sup>1,\*</sup>

11

12 <sup>1</sup> College of Veterinary Medicine, Jeonbuk National University, 79 Gobong-ro, Iksan, Jeonbuk,  
13 54596, Republic of Korea;

14 <sup>2</sup> Division of Biotechnology, College of Environmental & Bioresources Sciences, Jeonbuk  
15 National University, 79 Gobong-ro, Iksan, Jeonbuk, 54596, Republic of Korea;

16 <sup>3</sup> Jeonbuk National University, Advanced Institute of Environment and Bioscience, 54596  
17 Iksan, Republic of Korea

18

19 **\*Corresponding authors:**

20 Jin Hur; *E-mail address*: hurjin@jbnu.ac.kr

21 Won Il Kim; *E-mail address*: kwi0621@jbnu.ac.kr

22 Jung Hee Park; *E-mail address*: junghee.park@jbnu.ac.kr

23

24 <sup>a</sup> These authors contributed equally to the manuscript.

26 **Abstract**

27 This study explored the optimal culture conditions for maximizing shiga toxin production in  
28 Stx2e-producing *Escherichia coli* (STEC) 150229, isolated from porcine edema disease (ED),  
29 with the goal of preparing a Stx2e toxoid vaccine candidate. High cytotoxicity was observed  
30 for this strain [tissue culture cytotoxic dose 50% ( $10^4$  TCCD<sub>50</sub>/100  $\mu$ l)] from 48 h after  
31 incubation. Stx2e was overexpressed by transforming pStx2e A into STEC 150229, resulting  
32 in the production of recombinant Stx2e A/B complex combined with intrinsic Stx2e B. The  
33 enhanced production of Stx2e was evaluated based on the level of cytotoxicity against Vero  
34 cells. The highest cytotoxicity ( $10^5$  TCCD<sub>50</sub>/100  $\mu$ l) was observed with the samples of  
35 recombinant Stx2e A/B complex eluted with 500 mM imidazole at 48 h of incubation. In  
36 conclusion, the recombinant Stx2e A protein forms an active protein complex with the intrinsic  
37 Stx2e B component from STEC 150229, producing high levels of shiga toxin.

38

39 **Key words:** Edema disease; recombinant protein; shiga toxin; Stx2e A subunit; Stx2e B  
40 subunit

41

## 42 **Introduction**

43 In pigs and wild animals, edema disease (ED) is primarily caused by Stx2e-producing  
44 *Escherichia coli* [1, 2]. In humans, STEC also causes hemorrhagic colitis and/or hemolytic-  
45 uremic syndrome [3]. Pigs infected with STEC, which is associated with high doses of Stx2e  
46 toxin, can exhibit edema at various sites, most notably the colon, stomach, small intestine,  
47 eyelids, and brain. Evidence of damage to the vascular endothelium resulting from such edema  
48 includes ataxia, recumbence, convulsions, and paralysis [4], which ultimately result in a high  
49 mortality rate in Stx2e-producing *E. coli* -infected pigs [5, 6].

50 Shiga toxin-producing *E. coli* (STEC) produces two major toxin types, Stx1 and Stx2,  
51 which are functionally and structurally related to shiga toxin produced from *Shigella*  
52 *dysenteriae* [7]. Even though there is greater than 50% genetic similarity between Stx1 and  
53 Stx2 toxins [8, 9], they differ in their structural and immunological characteristics [10]. The  
54 animal-related variants of STX2 in STEC, which are not found in humans, are known as Stx2e  
55 [11], Stx2f [12], and Stx2g [13]. One of these, Stx2e as a component inducing enterotoxemia  
56 of pigs, is mainly found in ED-affected pigs. Structurally, Stx2e toxin exhibits a  
57 heterohexameric complex (1A5B type) in which a single A subunit is associated with a  
58 homopentamer of B subunits [3, 14, 15]. The heterohexameric complex consists of the A  
59 subunit, which plays a catalytic role, and five B subunits acting as glycolipid receptors and in  
60 the binding of globotriaosylceramide (Gb<sub>3</sub>) or globotetraosylceramide (Gb<sub>4</sub>), on intestinal  
61 epithelial cells [16-18]. In more detail, the A subunit is composed of A1 and A2 fragments,  
62 which are tethered by a disulfide bridge between cysteines 241 and 260. The A1 fragment  
63 contains an active site that mediates the cytotoxic effects. In contrast, the A2 fragment is  
64 located at the central hole of pentameric B subunit. The A subunit exerts N-glycosidase activity  
65 suspending protein synthesis within the targeted cells [15]. In this study, a cytotoxicity assay

66 was used to demonstrate the toxin production of STEC isolates from a field case of porcine  
67 ED, and enhancement of toxin production was also indicated by overexpressing recombinant  
68 N-His Stx2e A/B complex with intrinsic Stx2e B in STEC 150229 (recombinant Stx2e A/B  
69 complex).

70

## 71 **Materials and methods**

### 72 **Ethics Statement**

73 This study was performed in strict accordance with the recommendations of the Guide for  
74 the Care and Use of Laboratory Animals of the National Institutes of Health. All animal  
75 experimental protocol was approved by the Jeonbuk National University Institutional Animal  
76 Care and Use Committee (Approval Number: JBNU 2021-0136) and performed according to  
77 accepted veterinary standards set by the Jeonbuk National University animal care center. Mice  
78 were euthanized by CO<sub>2</sub> inhalation, as specified by the Jeonbuk National University  
79 Institutional Animal Care and Use Committee guidelines.

80

### 81 **Shiga toxin producing *E. coli* strain**

82 At Chonbuk National University Diagnostic Center, edema disease-causing STEC  
83 150229 was isolated from the feces of pigs from a pig farm in South Korea diagnosed with this  
84 disease (CBNU-VDC) [19]. The isolated STEC 150229 strain was routinely grown in LB broth  
85 (Affymetrix USB, CA, USA) at 37°C for 48 h. The cell-free supernatants of bacterial strains  
86 were prepared by culturing them, centrifugation (10,000 ×g for 5 min) and filtration (0.22-μm  
87 membranefilter; Sartorius Stedim Biotech, Goettingen, Germany).

88

### 89 **Cytopathic effect of Shiga toxin in animal cell line**

90 The cytopathic effect (CPE) was tested in Vero cell line 76 (ATCC CRL-1587). Vero  
91 cells were cultivated in Dulbecco's modified Eagle's medium (high glucose) (DMEM,  
92 #LM001-05; Welgene, Korea) supplemented with 10% fetal bovine serum, 1% L-glutamine  
93 200 mM (100×) (#25030-081; Gibco, NY, USA) and 1% Anti-anti (100×) (#15240-062; Gibco)  
94 at 37°C and 5% CO<sub>2</sub>. The Vero cell toxicity assay was performed in 96-well tissue culture  
95 plates (#351172; Falcon, NY, USA) using 10-fold dilutions of samples. The plates were

96 analyzed for the presence of CPE after 48 h and tissue culture cytotoxic dose 50%  
97 (TCCD<sub>50</sub>)/100 µl was calculated.

98

### 99 **Vector and Toxin gene cloning**

100 The gene of Stx2e A subunit (GenBank ID: CP024997.2) was amplified with specific  
101 primer sets and inserted into the modified expression vector with *NcoI* and *NotI* restriction  
102 enzyme (Fig. 2, pStx2eA). In order to modify an expression vector, the *pelB* gene, secretion  
103 signal sequence, was connected to the pET30a (New England Biolabs Inc., MA, USA) vector  
104 with *NdeI* and *NcoI* restriction site. A six-His tag was fused to the N-terminus of the Stx2e A  
105 gene to facilitate protein purification.

106 To prepare purified Stx2e protein for antibody production in mice, two additional  
107 plasmids were constructed; Stx2e A-fragment (amino acid 215-319) was inserted to pTWIN  
108 vector with *NcoI* and *BamHI* restriction enzyme (Fig. 2, pStx2e A-fusion). Stx2e B was inserted  
109 to pET30a vector with *NcoI* and *BamHI* restriction enzyme (Fig. 2, pStx2e B).

110

### 111 **Overexpression and purification of Stx2e and recombinant Stx2e A fusion/Stx2e B (r** 112 **Stx2e Afrag/B)**

113 The Stx2e A (Fig. 2) was overexpressed in STEC 150229 and *E. coli* BL21 (DE3) cells  
114 which cultured on LB broth containing 25 µg/mL of kanamycin (Duchefa, Netherlands). The  
115 protein expression was induced with 0.5 mM isopropyl β-D-1-thiogalactopyranoside (IPTG)  
116 (Duchefa) at O.D.<sub>600</sub> of 0.4 and the cells incubated for 24 h at 18°C, 170 rpm. The proteins  
117 were purified from supernatant with HisTrap FF column (GE Healthcare, PA, USA) and eluted  
118 using sequentially increased Imidazole concentration (25, 50, 100, 250 and 500 mM) in 10 mM  
119 Tris buffer, pH7.0. The protein obtained from serial elution step was analyzed by 15% SDS-  
120 PAGE.

121 The Stx2e A-fragment and Stx2e B proteins were co-expressed on *E. coli* BL21 (DE3)  
122 pLysS cells which cultured on LB broth containing 25 µg/ml of kanamycin, 50 µg/ml of  
123 ampicillin (Duchefa) and 34 µg/ml of chloramphenicol (Wako, Japan). The protein expression  
124 induced with 0.8 mM IPTG at O.D.<sub>600</sub> of 0.5 and cultures were incubated for 16 h at 18°C, 150  
125 rpm. Overexpressed proteins were purified with FPLC system (GE healthcare) by using  
126 HisTrap FF column (buffer A : 10mM Tris-HCl, pH 8.5, 100 mM NaCl and buffer B : 10 mM  
127 Tris-HCl, 100 mM NaCl, 500 mM Imidazole, pH8.5).

128

### 129 **Immunization of mice and challenge with recombinant Stx2e toxin**

130 Twenty C57BL/6 female mice were purchased and randomly divided into 2 groups. All  
131 groups were intramuscularly primed (IM) at week 6 of age [0 week post prime immunization  
132 (WPPI)] and were IM boosted at 2 WPPI. The immunized group mice were immunized with  
133 the 100 µg of rStx2e A frag/B. The negative control group mice were injected with sterile  
134 phosphate-buffered saline (PBS). To evaluate each the antigen-specific antibody titer, blood  
135 samples were collected at 0, 2 and 4 WPPI. All samples were stored at -80°C until use.

136

## 137 **Results**

### 138 **Optimizing cultivation of Shiga toxin producing *E. coli* strain**

139 To examine the optimal cell count and cytotoxicity levels, STEC 150229 was cultivated  
140 for 72 h. It showed its maximal cell count of 10<sup>8</sup> colony-forming units (CFU)/ml at 24 to 72 h  
141 after incubation and a high cytotoxicity level of 10<sup>4</sup> TCCD<sub>50</sub>/100 µl at 48 and 72 h after  
142 incubation (Fig. 1). Based on the results regarding the optimal culture conditions, culture of  
143 STEC150229 for 48 h was used in this experiment.

144

### 145 **Production of rStx2e A frag/B complex proteins and immunization of mice**

146 To increase the production of Stx2e complex, we tried to overexpress the recombinant 6-  
147 His Stx2e A protein in the STEC 150229 cell. According to our hypothesis, the recombinant  
148 protein could establish an enzymatically active complex with the innate toxin proteins. During  
149 the purification step, the intrinsic shiga toxin complex was removed using a column at a low  
150 imidazole concentration and the recombinant complex was eluted and concentrated (Fig. 3).  
151 Our findings showed that a functional Stx2e protein complex was constructed with the  
152 recombinant Stx2e A-His and intrinsic Stx2e B in STEC 150229 (rSTEC 150229), the  
153 cytotoxicity of which was evaluated in Vero cells.

154 To detect intrinsic and overexpressed Stx2e toxin, an antigen-specific antibody was  
155 required. However, the expression level of recombinant Stx2e (6-His Stx2e A and intrinsic  
156 Stx2e B) was extremely low, so it was difficult to purify and concentrate it for use as an antigen.  
157 Even purified recombinant Stx2e complex concentrated 1000-fold was not detected on western  
158 blotting with anti-His antibody (data not shown). In addition, rSTEC 150229 was difficult to  
159 inject into mice due to the high production of shiga toxin. Thus, we constructed a new  
160 recombinant protein able to produce antibodies and to detect shiga toxin of rSTEC 150229.

161 Anti-Stx2e antiserum was produced by two injections of rStx2e Afrag/B into C57BL/6  
162 mice. To detect intrinsic and overexpressed recombinant Stx2e toxin, SDS-PAGE (Fig. 3A)  
163 and western blotting with antiserum collected from a mouse injected with rStx2e Afrag/B were  
164 performed (Fig. 3B). The culture medium harbored secreted innate Stx2e toxin and  
165 recombinant toxin complex and purified proteins were concentrated 1000-fold. The estimated  
166 molecular weight of Stx2e A is 32 kDa and that of intrinsic Stx2e B is 7.7 kDa (14,15). Based  
167 on this estimation, Stx2e A with a size of 35 kDa was detected in STEC 150229 and rSTEC  
168 150229 although the concentration was significantly higher in rSTEC 150229. In addition,  
169 Stx2e A/B complex of approximately 55 kDa in size was detected only in rSTEC 150229 (Fig.  
170 3B). The Stx2e A and B proteins purified from rSTEC 150229 cells were not detected in



171 western blotting, even after 1000-fold concentration.

172

### 173 **Cytopathic effect of recombinant Stx2e complex protein**

174 The cytotoxicity of all samples is listed in Table 1. Deletion of the N-terminus of Stx2e  
175 A, which is involved in the enzymatic reaction, was associated with the loss of cytotoxicity  
176 (Table 1). The cytotoxic activities were not detected in Stx2e Afrag/B protein-overexpressing  
177 *E. coli* BL21 (DE3) or in native *E. coli* BL21 (DE3), as a negative control (Table S1).

178 The cytotoxicity of unbound and eluted sample with a low imidazole concentration was  
179 caused by the intrinsic toxin complex. The cytotoxic activity of recombinant 6-His Stx2e A/B  
180 samples eluted with 500 mM imidazole was significantly higher than that of all other imidazole  
181 elution samples of recombinant 6-His Stx2e A/B and STEC 150229 culture supernatant. The  
182 cytotoxicity of eluted sample with 500 mM imidazole was measured in  $10^5$  TCCD<sub>50</sub>/100  $\mu$ l at  
183 48 h of incubation. The other samples showed the lower cytotoxicity,  $10^3$  to  $10^4$  TCCD<sub>50</sub>/100  
184  $\mu$ l at 48 h of incubation (Table 1).

185

### 186 **Discussion**

187 In this study, we designed recombinant 6-His Stx2e A/B plasmids based on the shiga  
188 toxin sequence of STEC isolates to produce recombinant toxin proteins in a heterologous  
189 expression system. We also evaluated the cytotoxicity for the toxin protein complex active  
190 form of recombinant Stx2e A-His and intrinsic Stx2e B in STEC 150229. STEC 150229  
191 showed that the production of shiga toxin was highest in a previous report [19]. From a total  
192 of 43 isolates from diagnosed case strains, 14 edema disease-causing *E. coli* strains including  
193 Stx2e and F18 genes were confirmed by toxin gene PCR. Among the edema disease-causing  
194 *E. coli*, 13 strains were observed to have cytotoxicity levels of 10 to  $10^2$  TCCD<sub>50</sub>/100  $\mu$ l,  
195 whereas STEC 150229 was observed to have a higher cytotoxicity level of  $10^3$  TCCD<sub>50</sub>/100  $\mu$ l

196 in Vero cells [19] (data not shown). As it is known that these cells can synthesize and secrete  
197 the intrinsic shiga toxin to the extracellular region, we hypothesized that the overexpressed  
198 recombinant Stx2e A protein forms an active protein complex with the intrinsic Stx2e B  
199 component from STEC 150229. The recombinant Stx2e A contained the PelB peptide, the  
200 secretion leader, and it could be secreted into the periplasmic space of *E. coli*. Therefore, the  
201 Stx2e complex was collected and purified from the growth medium after protein  
202 overexpression. The cytotoxic activity of recombinant 6-His Stx2e A/B protein samples eluted  
203 with a higher imidazole concentration was significantly higher than that of all other imidazole  
204 elution samples. The cytotoxicity of recombinant 6-His Stx2e A/B from rSTEC 150229  
205 samples eluted with 500 mM imidazole were measured in  $10^5$  TCCD<sub>50</sub>/100  $\mu$ l in Vero cells  
206 upon 48 h of incubation. Higher production of shiga toxin was obtained from recombinant 6-  
207 His Stx2e A/B. To detect purified recombinant Stx2e A and intrinsic B complex, we performed  
208 western blotting using mouse-generated anti-Stx2e serum. The rSTEC 150229 secreted higher  
209 concentrations of toxins than the wild-type STEC 150229 cells (Table 1). A nonspecific band  
210 detected in the negative control appeared to represent the protein originating from *E. coli* cells.  
211 However, purified Stx2e A protein was not detected. The detection limit of western blotting is  
212 known to be on the order of picograms depending on the ECL sensitivity. This indicates that  
213 our purified protein might have high toxicity even when present at only a low level.

214

## 215 **Conclusion**

216 In conclusion, the recombinant Stx2e A protein forming an active protein complex with  
217 the intrinsic Stx2e B component from STEC 150229 and rSTEC 150229 produced high levels  
218 of shiga toxin.

219

## 220 **Acknowledgements**

221           This research was supported by a grant from the Next-Generation BioGreen Program  
222 (PJ016225012021), Rural Development Administration, Republic of Korea, and by the  
223 National Research Foundation of Korea (NRF) grant funded by the Korea government (NRF-  
224 2020R1I1A2074647).

225

227 **Author's contributions**

228 **Conceptualization:** Jung Hee Park, Won Il Kim, Jin Hur

229 **Data curation:** Byoung Joo Seo, Jeong Hee Yu, Seung Chai Kim, Byung Yong Park

230 **Supervision:** Jung Hee Park, Won Il Kim, Jin Hur

231 **Writing-original draft:** Byoung Joo Seo, Jeong Hee Yu

232 **Writing-review & editing:** Jung Hee Park, Jin Hur

233

234 **Declaration of conflicting interests**

235 The author(s) declared no potential conflicts of interest with respect to the research,

236 authorship, and/or publication of this article.

238 **References**

- 239 1. Alvin WHL, Kristof M, Maia De K, Lea B, Els P, Han R, Henri De G. The Molecular  
240 Mechanism of Shiga Toxin Stx2e Neutralization by a Single-domain Antibody Targeting  
241 the Cell Receptor-binding Domain. *J Biol Chem.* 2014; 289: 25374-25381.
- 242 2. Jacek O, Peter G, Dieter P. Characterization of shiga toxin-producing *Escherichia coli*  
243 strains isolated from calves in Poland. *Comp Immunol Microbiol Infect Dis.* 2000; 23:  
244 267-276.
- 245 3. Gyles CL. Shiga toxin-producing *Escherichia coli*: an overview. *J Anim Sci.* 2007; 85:  
246 45-62.
- 247 4. Imberechts H, Deprez P, Van Driessche E, Pohl P. Chicken egg yolk antibodies against  
248 F18ab fimbriae of *Escherichia coli* inhibit shedding of F18 positive *Escherichia coli* by  
249 experimentally infected pigs. *Vet Microbiol.* 1997; 54: 329-341.
- 250 5. Nancy AC, Ilze M, James ES, Brad TB, Harley WM. Shiga toxin-producing *Escherichia*  
251 *coli* infection: temporal and quantitative relationships among colonization, toxin  
252 production, and systemic disease. *J Infect Dis.* 2000; 181: 242-251.
- 253 6. Ilze M, Nancy AC, James ES, Harley WM. Binding of Shiga toxin 2e to porcine  
254 erythrocytes in vivo and in vitro. *Infect Immun.* 2003; 71: 5194-5201.
- 255 7. Alison DO, Randall KH. Shiga and shiga-like toxins. *Microbiol Rev.* 1987; 51: 206-220.
- 256 8. Patton AW, Patton JC, Heuzenroeder MW, Goldwater PN, Manning PA. Cloning and  
257 nucleotide sequence of a variant Shiga-like toxin II from *Escherichia coli* OX3:H21  
258 isolated from a case of sudden infant death syndrome. *Microb Pathog.* 1992; 13: 225-236.
- 259 9. Pierard D, Muyldermans G, Moriau L, Stevens D, Lauvers S. Identification of new  
260 verotoxin type 2 variant B-subunit genes in human and animal *Escherichia coli* isolates.  
261 *J Clin Microbiol.* 1998; 36: 3317-3322.
- 262 10. Angela RM-C, James ER, Clare KS, Stephen D, Alison DO. Virulence of Shiga Toxin-

- 263 Producing *Escherichia coli* (STEC) in Orally-Infected Mice Correlates with the Type of  
264 Toxin Produced by the Infecting Strain. *Jpn J Med Sci Biol.* 1998; 51: S108-5114.
- 265 11. Debra LW, Matthew PJ, James ES, Randall KH, Alison DO. Cloning and sequencing of  
266 a Shiga-like toxin type II variant from *Escherichia coli* strain responsible for edema  
267 disease of swine. *J Bacteriol.* 1988; 170: 4223-4230.
- 268 12. Herbert S, Jurgen S, Stefano M, Alfredo C, Lothar HW, Helge K. A new Shiga toxin 2  
269 variant (Stx2f) from *Escherichia coli* isolated from pigeons. *Appl Environ Microbiol.*  
270 2000; 66: 1205-1208.
- 271 13. Cristina G-A, Maite M, Juan J, Anicet RB. Newly identified bacteriophages carrying the  
272 stx2g Shiga toxin gene isolated from *Escherichia coli* strains in polluted waters. *FEMS*  
273 *Microbiol Lett.* 2006; 258: 127-135.
- 274 14. Marie E.F., Maia M.C., Yuri V.K., Michael N.G.J. Crystal structure of the holotoxin from  
275 *Shigella dysenteriae* at 2.5 Å resolution. *Nat Struct Mol Biol* 1994, 59: 59-64.
- 276 15. Marie EF, Masao F, Maia MC, Angela RM-C, Edda MT, Alison DO, Michael NGJ.  
277 Structure of shiga toxin type 2 (Stx2) from *Escherichia coli* O157:H7. *J Biol Chem.* 2004;  
278 279: 27511-27517.
- 279 16. Toshio S, Takeshi M, Eiji T, Yumiko K, Sou-Ichi M, Ko K, Kazutoshi S, Takashi H.  
280 Evaluation of Recombinant Forms of the Shiga Toxin Variant Stx2eB Subunit and Non-  
281 Toxic Mutant Stx2e as Vaccine Candidates against Porcine Edema Disease. *J Vet Med*  
282 *Sci.* 2013; 75: 1309-1315.
- 283 17. Toshifumi T, Tadshi T, Yeong-Man H, Yasutsugu S, Hisao K, Takashi Y, Chihiro S,  
284 Masanosuke Y, Yoshifumi T. Identity of molecular structure of Shiga-like toxin I (VT1)  
285 from *Escherichia coli* O157:H7 with that of Shiga toxin. *Microb Pathog.* 1988; 57: 57-69.
- 286 18. Katsuhiko T, Shiho S, Wataru S. A globotetraosylceramide (Gb4) receptor-based ELISA  
287 for quantitative detection of Shiga toxin 2e. *J Vet Med Sci.* 2015; 77: 973-976.

- 288 19. Seo BJ, Jeong CG, Kang AR, Cho HS, Kim WI. Evaluation of the virulence genes and  
289 Shiga toxin expressions of porcine edema disease causing *Escherichia coli* isolated in  
290 Korea. *Korean J Vet Serv.* 2016; 39: 87-92.

291

292

293 Figure Legends

294 Fig. 1. The optimization and cytotoxicity levels of STEC 150229 during incubation.

295 Fig. 2. Scheme of the gene constructs of recombinant Stx2e A and B proteins. In pStx2eA  
296 plasmid, the pelB signal sequence for periplasmic secretion was connected at the N-  
297 terminus of the Stx2eA gene and a 6-histidine tag was inserted in the middle to  
298 facilitate purification. In the pStx2eA-fusion plasmid, Stx2eA fragment (a.a. 215–319)  
299 was connected to the N-terminus of the intein protein in the pTWIN1 vector. Stx2eB  
300 gene was inserted into the pET30a vector, which contained a signal peptide in the N-  
301 terminus.

302 Fig. 3. SDS-PAGE (A) and western blotting (B) of recombinant Stx2eA and innate Stx2eB. In  
303 lanes 2 and 3, Stx2eA protein was detected (arrow). [Lane M: size marker; Lane 1: *E.*  
304 *coli* BL21 (DE3) cell (negative control); Lane 2: concentrated STEC 150229 culture  
305 medium; Lane 3: concentrated Stx2eA-overexpressing STEC 150229 culture medium;  
306 Lane 4: flow-through; Lane 5: eluent with 250 mM imidazole; Lane 5: eluent with 500  
307 mM imidazole].



309 Table I. Cytotoxic levels of recombinant Stx2e A<sub>6</sub>-His/B and STEC 150229 in Vero cell

| Samples                   | Imidazole Conc.<br>(mM) | 10 fold dilutions |   |   |   |   |   |
|---------------------------|-------------------------|-------------------|---|---|---|---|---|
|                           |                         | 1                 | 2 | 3 | 4 | 5 | 6 |
| BL21                      |                         | - <sup>a)</sup>   | - | - | - | - | - |
| 150229                    |                         | + <sup>b)</sup>   | + | + | + | - | - |
|                           | flow                    | -                 | - | - | - | - | - |
| BL21 +                    | 20                      | -                 | - | - | - | - | - |
| Stx2e A <sub>6</sub> -His | 50                      | -                 | - | - | - | - | - |
| (pStx2eA)                 | 250                     | -                 | - | - | - | - | - |
|                           | 500                     | -                 | - | - | - | - | - |
|                           | flow                    | +                 | + | + | - | - | - |
| 150229 +                  | 20                      | +                 | + | + | - | - | - |
| Stx2e A <sub>6</sub> -His | 50                      | +                 | + | + | - | - | - |
| (pStx2eA)                 | 250                     | +                 | + | + | + | - | - |
|                           | 500                     | +                 | + | + | + | + | - |
|                           | 20                      | -                 | - | - | - | - | - |
| Elution buffer            | 50                      | -                 | - | - | - | - | - |
|                           | 250                     | -                 | - | - | - | - | - |
|                           | 500                     | -                 | - | - | - | - | - |
| Control                   |                         | -                 | - | - | - | - | - |

<sup>a)</sup> None cytotoxicity; <sup>b)</sup> Cytotoxicity

310

311

312 **Supporting information**

313 **S1 Table. Cytotoxic levels of recombinant Stx2e A-fragment and Stx2e B in Vero cell.**

314 **S1 Fig. Scheme of the purification of recombinant Stx2e complex in STEC 150229 cells.**

315           The innate Stx2e complex was washed with a low imidazole concentration and the  
316           recombinant Stx2e complex was eluted in an increasing imidazole concentration.

317

318

319 Table SI. Cytotoxic levels of recombinant Stx2e A-fragment and Stx2e B in Vero cell

| Samples          | Imidazole Conc.<br>(mM) | 10 fold dilutions |   |   |   |   |   |
|------------------|-------------------------|-------------------|---|---|---|---|---|
|                  |                         | 1                 | 2 | 3 | 4 | 5 | 6 |
| BL21             |                         | - <sup>a)</sup>   | - | - | - | - | - |
| 150229           |                         | + <sup>b)</sup>   | + | + | + | - | - |
|                  | flow                    | -                 | - | - | - | - | - |
| BL21 +           | 20                      | -                 | - | - | - | - | - |
| Stx2e A-fragment | 50                      | -                 | - | - | - | - | - |
| (pStx2eA-fusion) | 250                     | -                 | - | - | - | - | - |
|                  | 500                     | -                 | - | - | - | - | - |
|                  | flow                    | -                 | - | - | - | - | - |
| BL21 +           | 20                      | -                 | - | - | - | - | - |
| Stx2e B          | 50                      | -                 | - | - | - | - | - |
| (pStx2eB)        | 250                     | -                 | - | - | - | - | - |
|                  | 500                     | -                 | - | - | - | - | - |
|                  | 20                      | -                 | - | - | - | - | - |
| Elution buffer   | 50                      | -                 | - | - | - | - | - |
|                  | 250                     | -                 | - | - | - | - | - |
|                  | 500                     | -                 | - | - | - | - | - |
| Control          |                         | -                 | - | - | - | - | - |

<sup>a)</sup> None cytotoxicity; <sup>b)</sup> Cytotoxicity

320

321

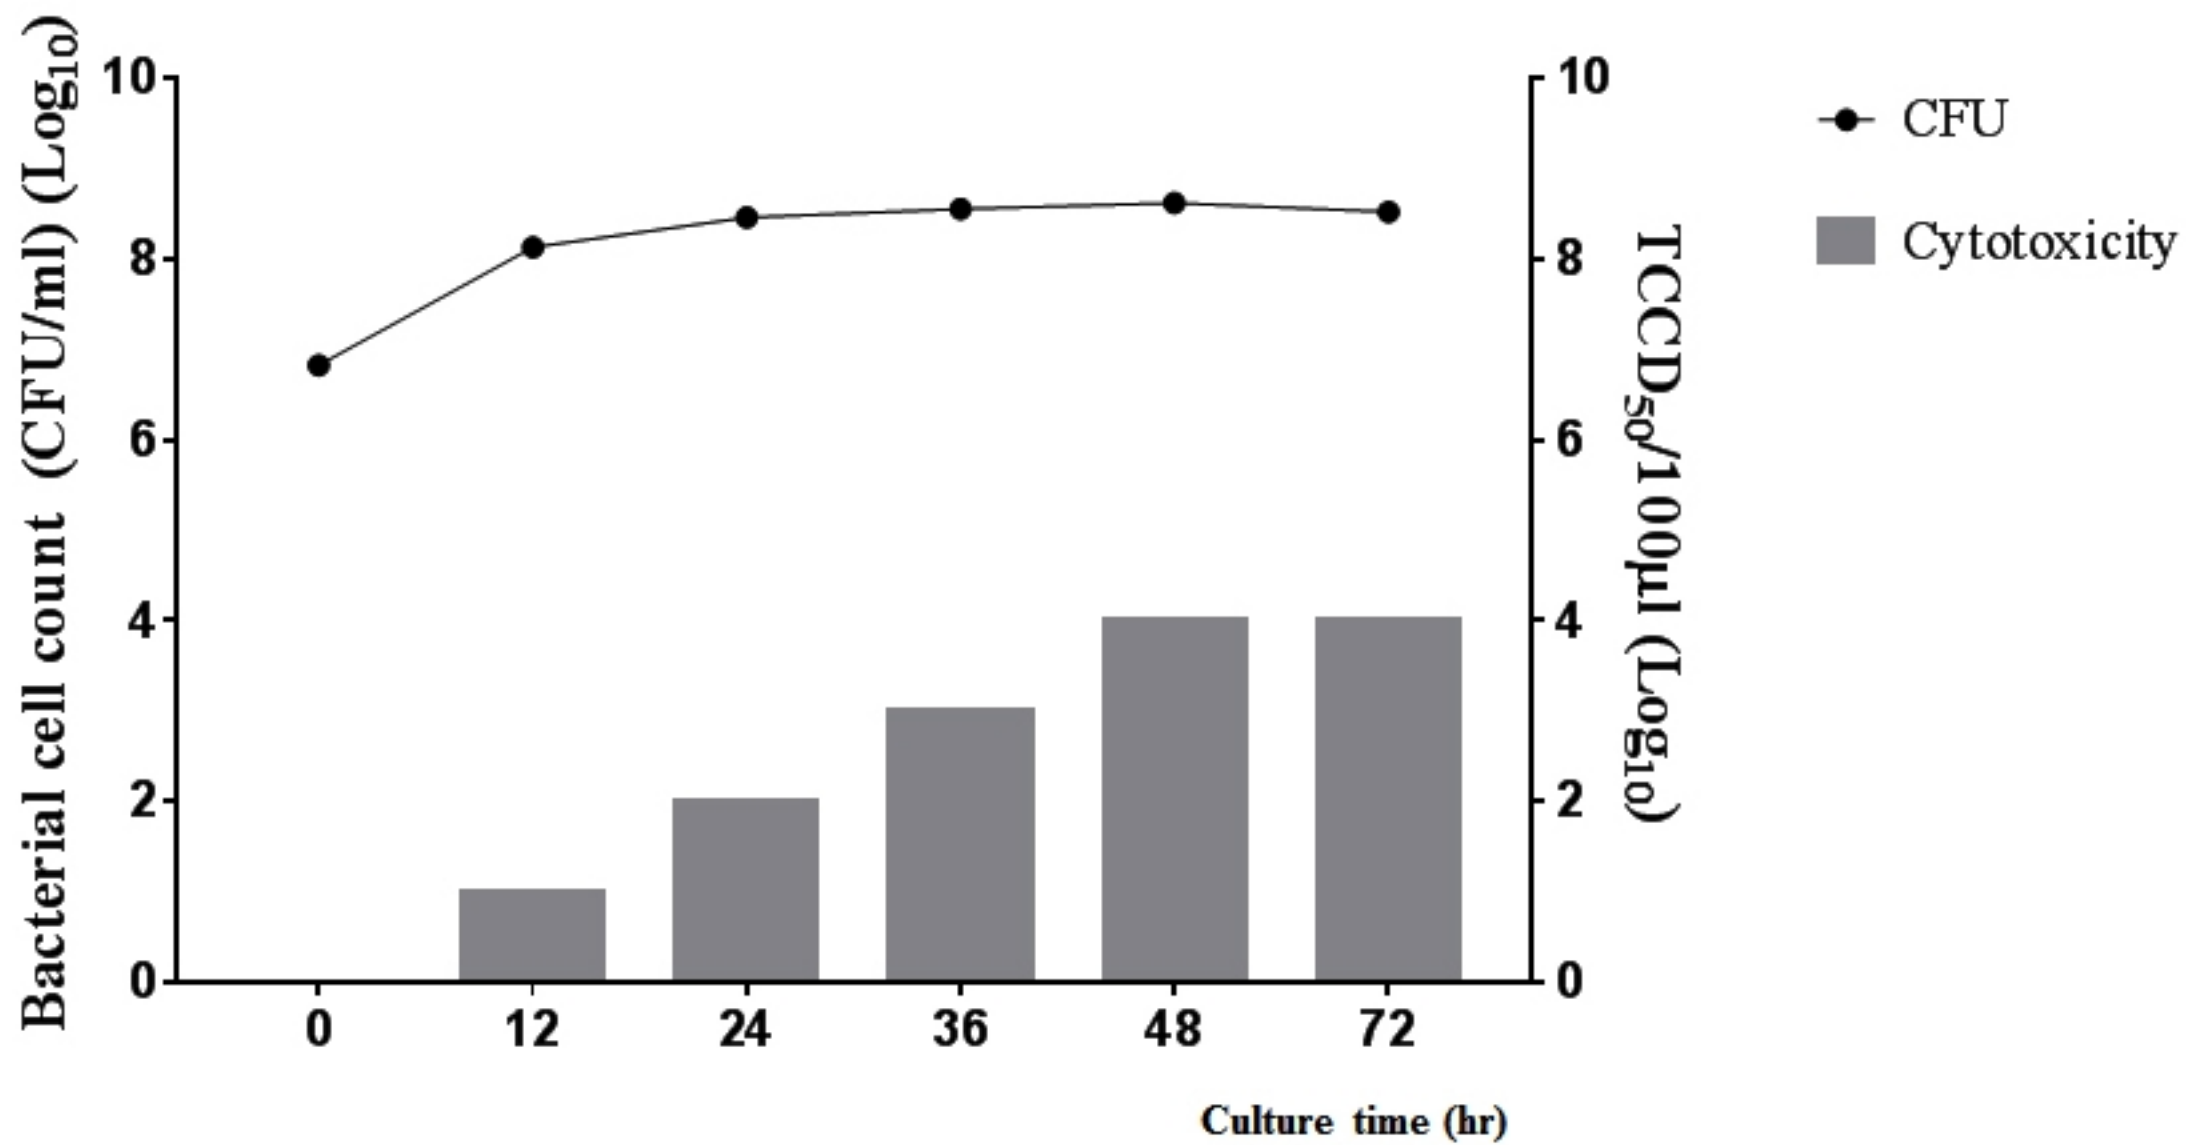

Figure

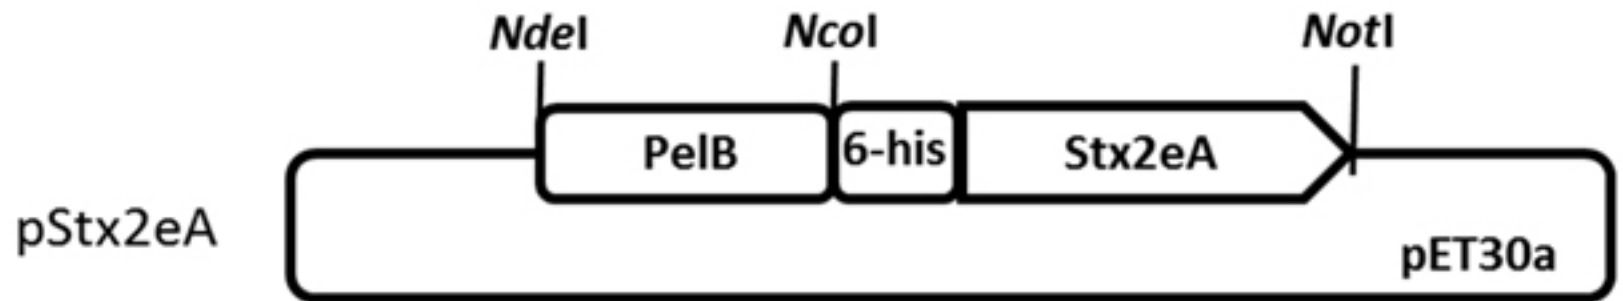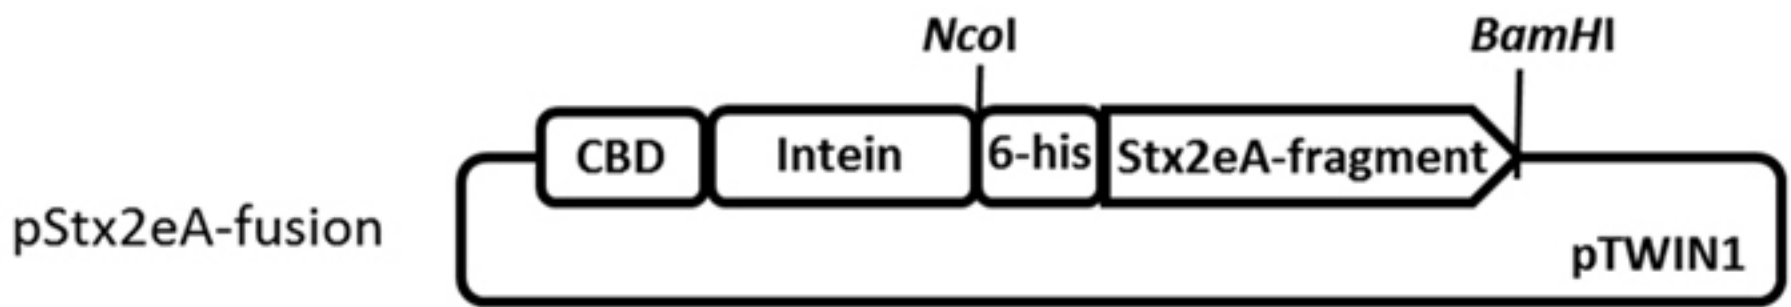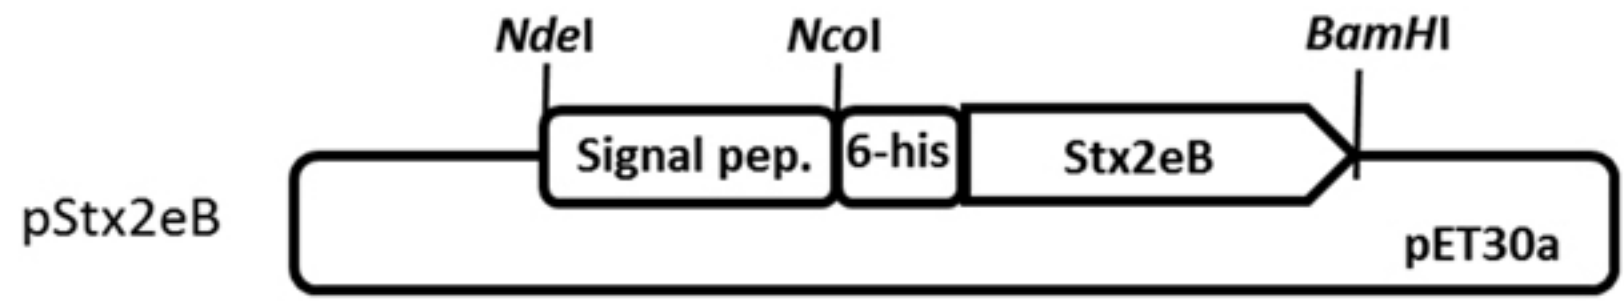

Figure

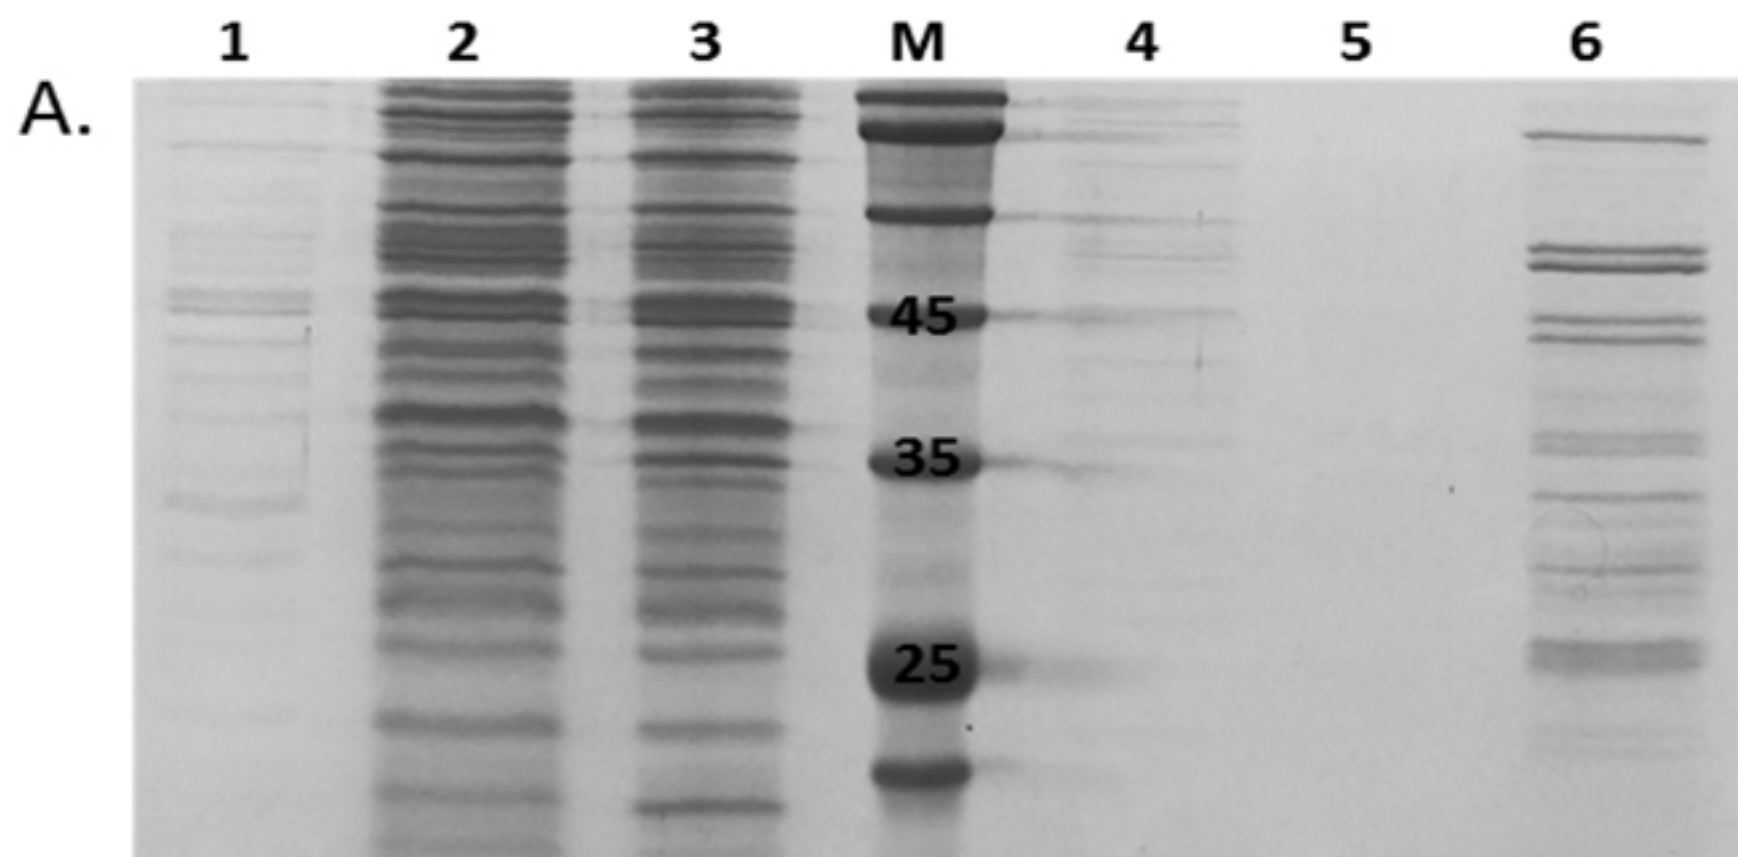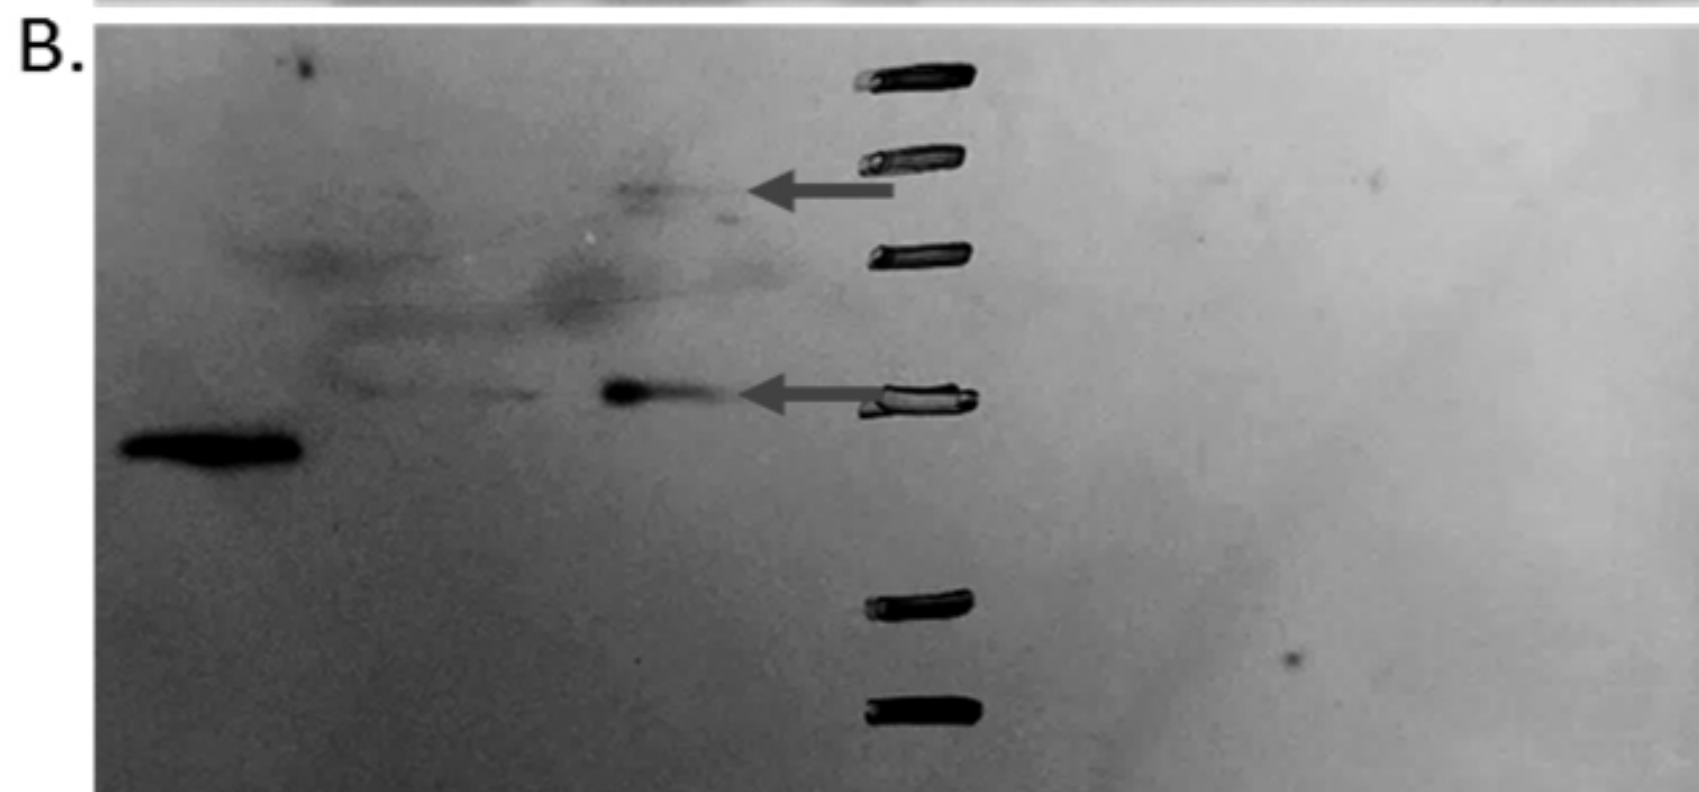

Figure

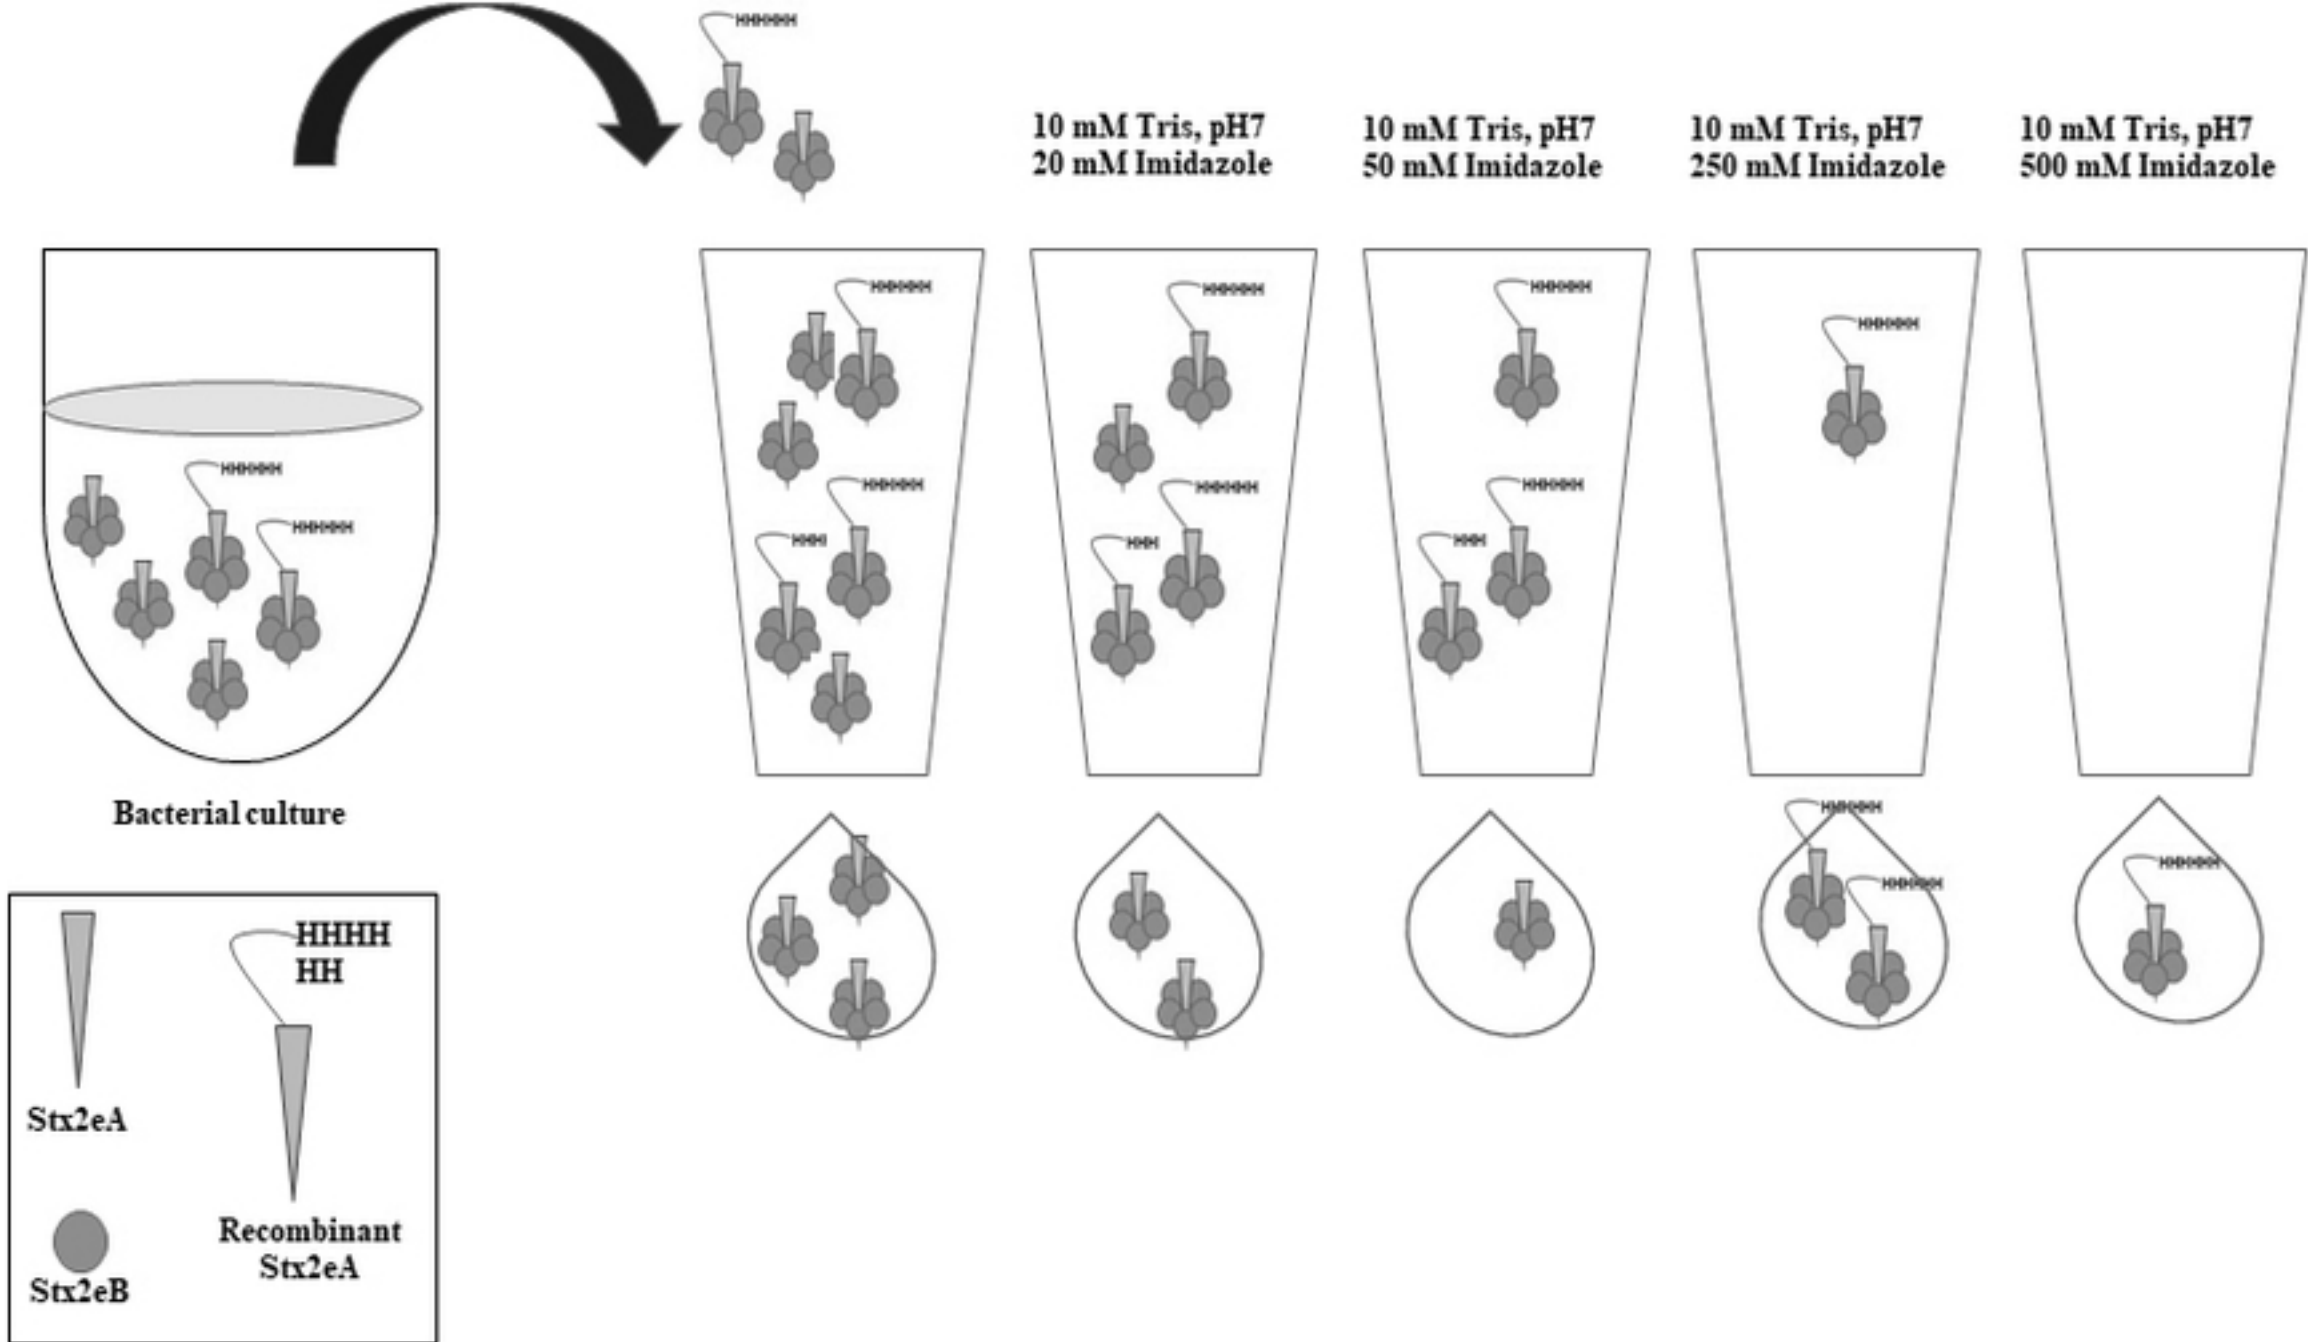

Figure
